# Supplementary material for: Angiotensin II-Induced Vasoconstriction via Rho Kinase Activation in Pressure-Overloaded Rat Thoracic Aortas
Source: MDPI journal article supplement (doi:10.3390/biom11081076), 2021-07-21
Supplement: s1 [file s1]

## **Supplementary Materials**

### **Angiotensin II-Induced Vasoconstriction via Rho Kinase Activation in Pressure-Overloaded Rat Thoracic Aortas**

Yuka Terada and Katsutoshi Yayama \*

Laboratory of Cardiovascular Pharmacology, Department of Biopharmaceutical Sciences, Kobe Gakuin University, Minatojima 1-1-3, Chuo-ku, Kobe 650-8586, Japan

\*Correspondence: [yayama@pharm.kobegakuin.ac.jp](mailto:yayama@pharm.kobegakuin.ac.jp); Tel.: +81-78-974-4721

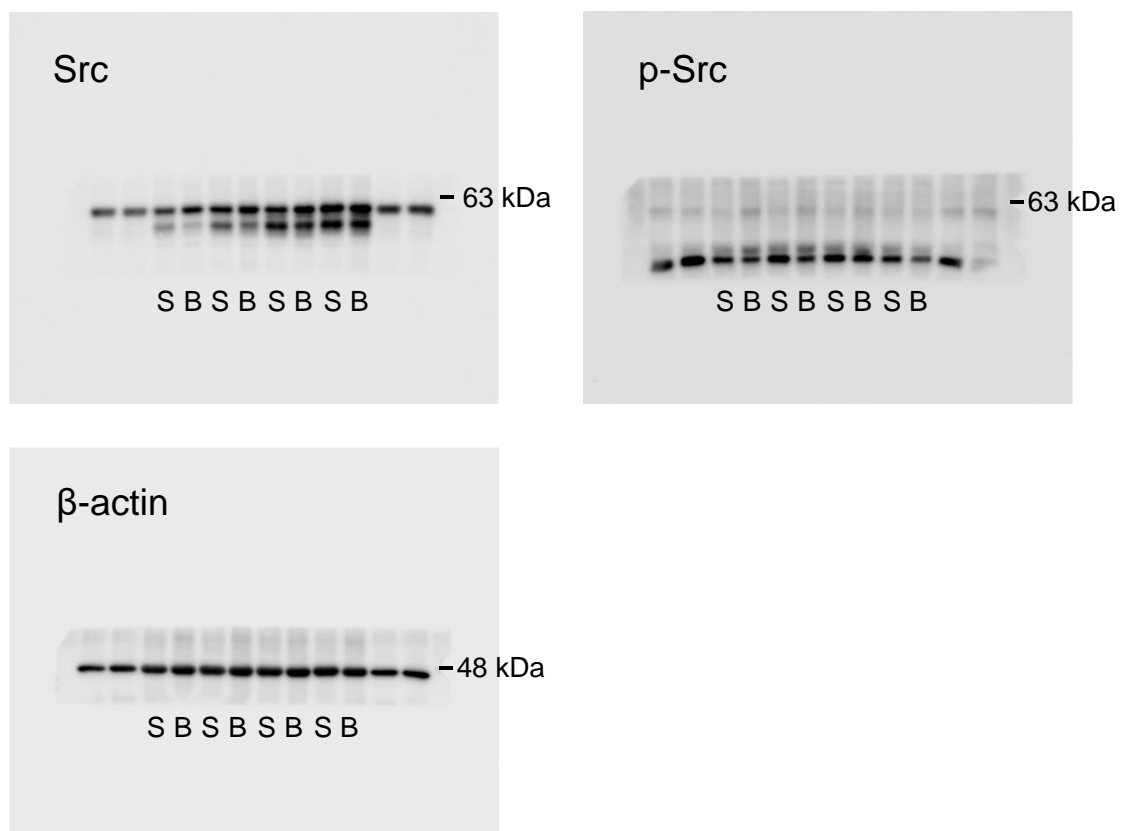

**Figure S1.** Original blots of Figure 2A. S: Sham, B: Banding.

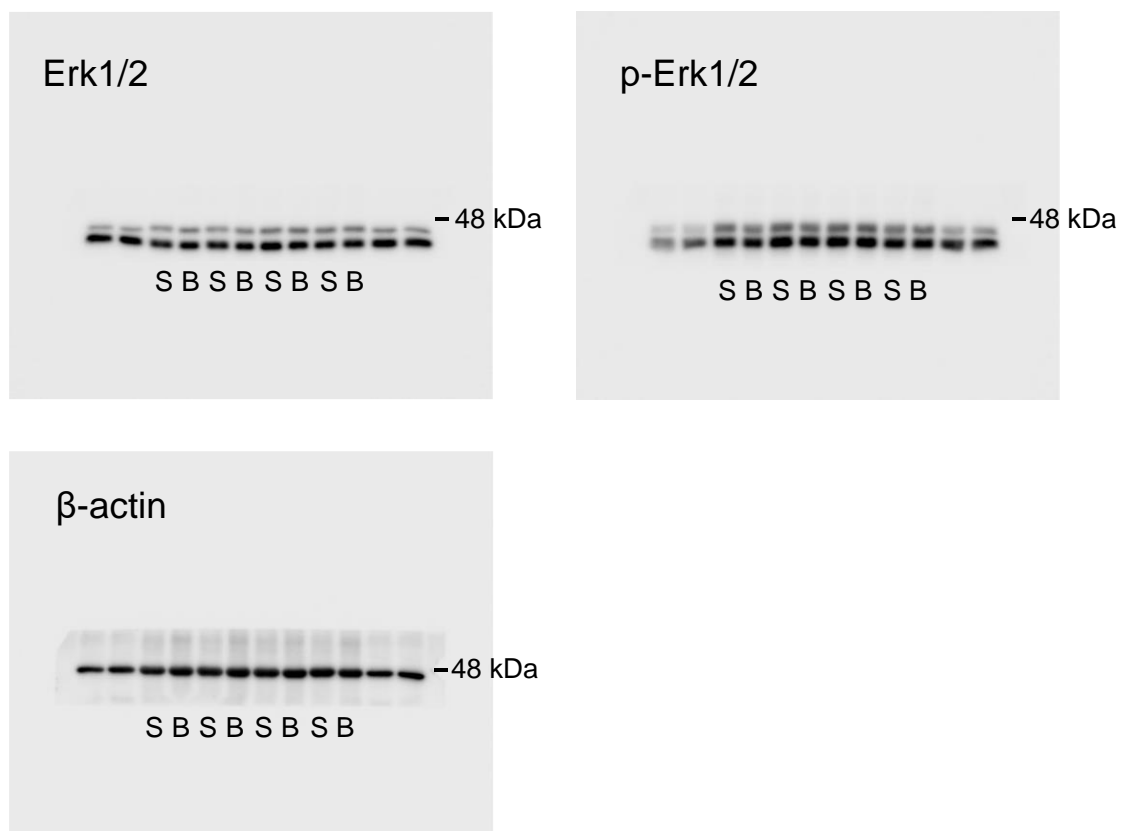

**Figure S2.** Original blots of Figure 2B. S: Sham, B: Banding.

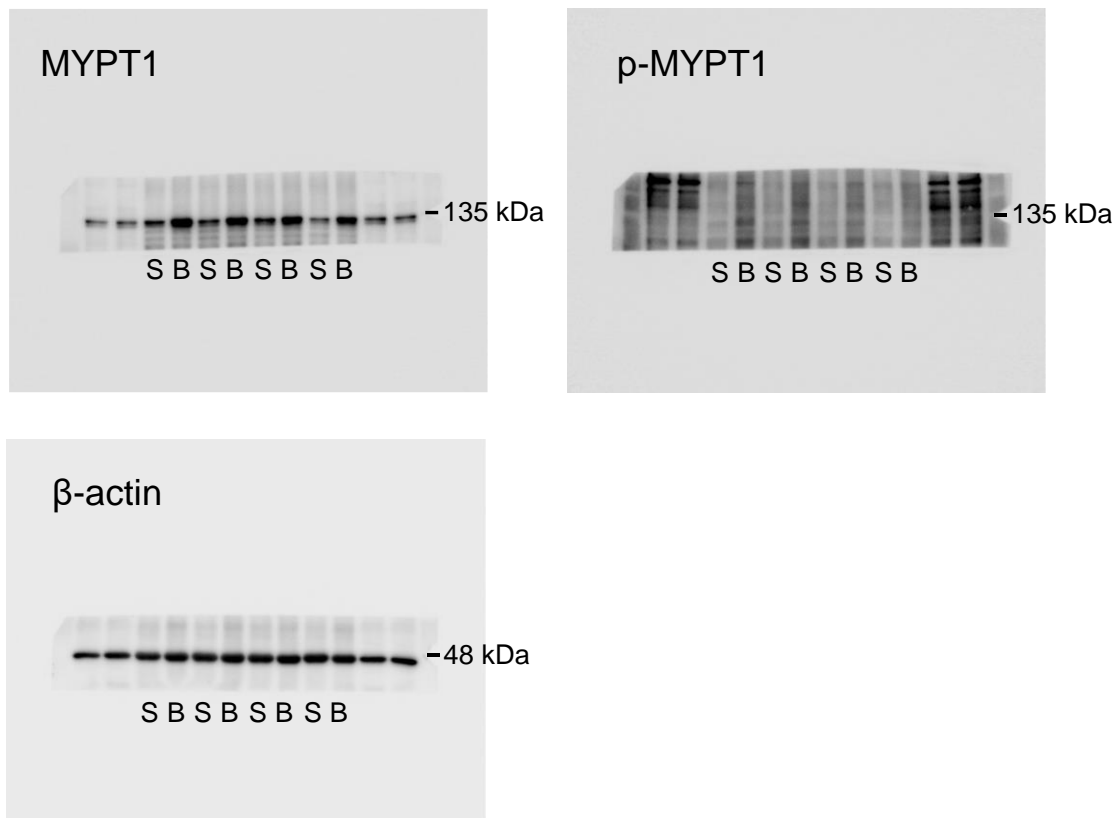

**Figure S3.** Original blots of Figure 2C. S: Sham, B: Banding.

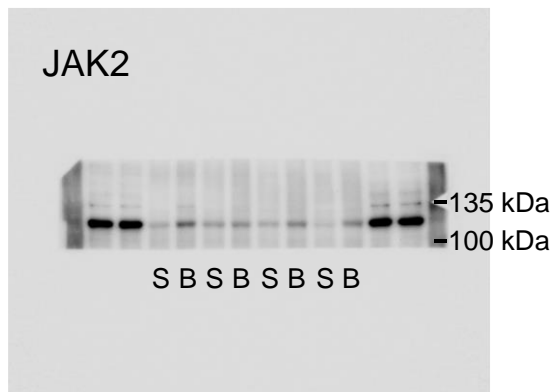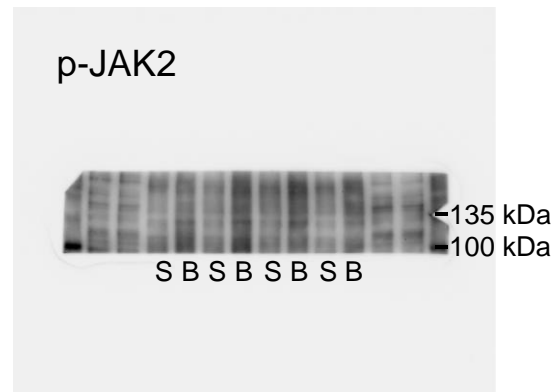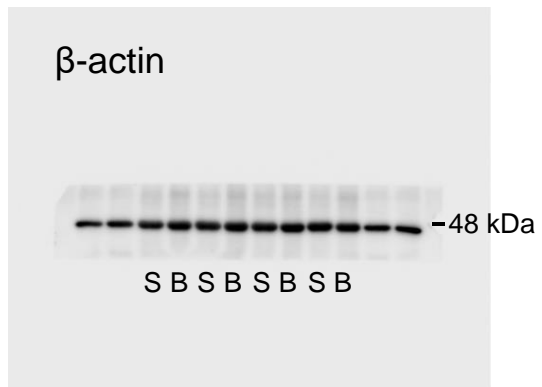

**Figure S4.** Original blots of Figure 2D. S: Sham, B: Banding.
